# Supplementary material
Source: PubMed Central journal article supplement (PMC4615191)
Supplement: krnb-12-01-1017219-s001.pdf [file krnb-12-01-1017219-s001.pdf]

## Supplementary information

**Table S1. Integrative analysis of KEGG signaling pathways involving miR-17~92, 105~25 and 99a~125b clusters by **mirFOCUS**.**

| KEGG ID  | KEGG Pathway                                      | Involved miRNAs                                                                     |
|----------|---------------------------------------------------|-------------------------------------------------------------------------------------|
| hsa05219 | 4.62 Bladder cancer                               | hsa-miR-106b,hsa-miR-25,hsa-miR-125b,hsa-miR-99a,hsa-let-7c,hsa-miR-19a,hsa-miR-92a |
| hsa04350 | 4.57 TGF-beta signaling pathway                   | hsa-miR-106b,hsa-miR-125b,hsa-let-7c,hsa-miR-19a,hsa-miR-92a                        |
| hsa05220 | 3.68 Chronic myeloid leukemia                     | hsa-miR-106b,hsa-miR-25,hsa-miR-125b,hsa-miR-99a,hsa-let-7c,hsa-miR-19a,hsa-miR-92a |
| hsa05212 | 3.68 Pancreatic cancer                            | hsa-miR-106b,hsa-miR-25,hsa-miR-125b,hsa-let-7c,hsa-miR-19a,hsa-miR-92a             |
| hsa05214 | 3.65 Glioma                                       | hsa-miR-106b,hsa-miR-25,hsa-miR-125b,hsa-miR-99a,hsa-let-7c,hsa-miR-19a             |
| hsa04012 | 3.04 ErbB signaling pathway                       | hsa-miR-106b,hsa-miR-25,hsa-miR-125b,hsa-miR-99a,hsa-let-7c,hsa-miR-19a             |
| hsa05218 | 2.65 Melanoma                                     | hsa-miR-125b                                                                        |
| hsa00830 | 2.45 Retinol metabolism                           | hsa-miR-125b                                                                        |
| hsa00980 | 2.04 Metabolism of xenobiotics by cytochrome P450 | hsa-miR-125b                                                                        |
| hsa05223 | 2.03 Non-small cell lung cancer                   | hsa-miR-106b,hsa-miR-25,hsa-miR-125b,hsa-let-7c,hsa-miR-19a                         |
| hsa04144 | 1.93 Endocytosis                                  | hsa-miR-106b,hsa-miR-125b,hsa-miR-99a,hsa-let-7c,hsa-miR-19a,hsa-miR-92a            |
| hsa00982 | 1.77 Drug metabolism - cytochrome P450            | hsa-miR-125b                                                                        |
| hsa05215 | 1.76 Prostate cancer                              | hsa-miR-106b,hsa-miR-25,hsa-miR-125b,hsa-miR-99a,hsa-let-7c,hsa-miR-19a             |
| hsa04010 | 1.68 MAPK signaling pathway                       | hsa-miR-106b,hsa-miR-25,hsa-miR-125b,hsa-miR-99a,hsa-let-7c,hsa-miR-19a,hsa-miR-92a |
| hsa04115 | 1.52 p53 signaling pathway                        | hsa-miR-106b,hsa-miR-25,hsa-miR-125b,hsa-let-7c,hsa-miR-19a,hsa-miR-92a             |
| hsa04110 | 1.52 Cell cycle                                   | hsa-miR-106b,hsa-miR-25,hsa-miR-125b,hsa-let-7c,hsa-miR-19a,hsa-miR-92a             |
| hsa05210 | 1.49 Colorectal cancer                            | hsa-miR-106b,hsa-miR-25,hsa-miR-125b,hsa-miR-99a,hsa-let-7c,hsa-miR-19a,hsa-miR-92a |
| hsa00150 | 1.43 Androgen and estrogen metabolism             | hsa-miR-125b                                                                        |
| hsa00040 | 1.43 Pentose and glucuronate interconversions     | hsa-miR-125b                                                                        |
| hsa00860 | 1.43 Porphyrin and chlorophyll metabolism         | hsa-miR-125b                                                                        |
| hsa00053 | 1.43 Ascorbate and aldarate metabolism            | hsa-miR-125b                                                                        |

**Table S2. Ingenuity analysis of predicted pathways for five key mRNAs.**

| Signaling pathway   | RAC1 | NFκB1 | MYC | JUN | CCND1 |
|---------------------|------|-------|-----|-----|-------|
| B cell receptor     | +    | +     |     | +   |       |
| Wnt                 | +    |       | +   | +   | +     |
| Toll-like receptor  | +    | +     |     | +   |       |
| Neurotrophin MAPK   | +    | +     |     | +   |       |
| ErbB                | +    |       | +   | +   | +     |
| Jak-STAT            |      |       | +   | +   |       |
| NOD-like receptor   |      |       | +   |     | +     |
| Chemokine           |      | +     |     |     |       |
| p53                 | +    | +     |     |     |       |
| Adipocytokine       |      |       |     |     | +     |
| RIG-I-like receptor |      | +     |     |     |       |
| VEGF                |      | +     |     |     |       |
| Fc epsilon RI       | +    |       |     |     |       |
| TGF-beta            | +    |       |     |     |       |
| GnRH                |      |       | +   |     |       |
|                     |      |       |     | +   |       |

|                                |                    |
|--------------------------------|--------------------|
| 5' UCCCUGAGACCCUAACUUGUGA 3'   | miR-125b           |
|                                |                    |
| 3' AGGGACTCTGGGATT GA ACACT 5' | antimiR-125b       |
|                                |                    |
| 5' UCCCUGAGACCCUAACUUGUGA 3'   | miR-125b           |
|                                |                    |
| 3'AGGGACTC                     | 5' t-antimiR-125b  |
|                                |                    |
| 5' AACCCGUAGAUCCGAUCUUGUG 3'   | miR-99a            |
|                                |                    |
| 3' TTGGGCAT                    | 5' t-antimiR-99a   |
|                                |                    |
| 5'UGAGGUAGUAGGUUGUAUGGUU3'     | miR-let-7          |
|                                |                    |
| 3' ACTCCA TC                   | 5' t-antimiR-let-7 |

**Figure S1.**

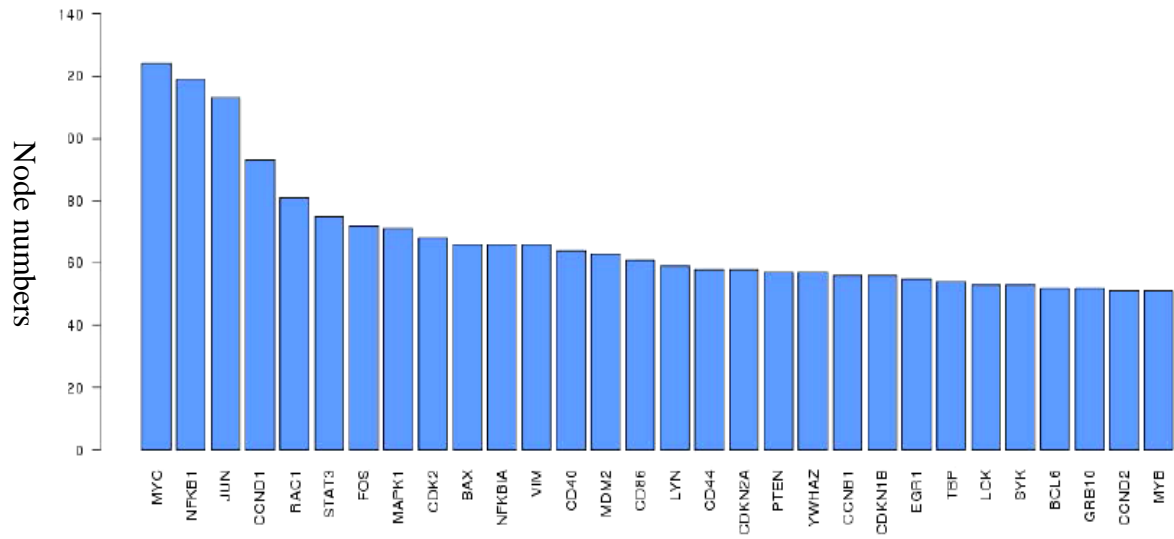

**Figure S2.**

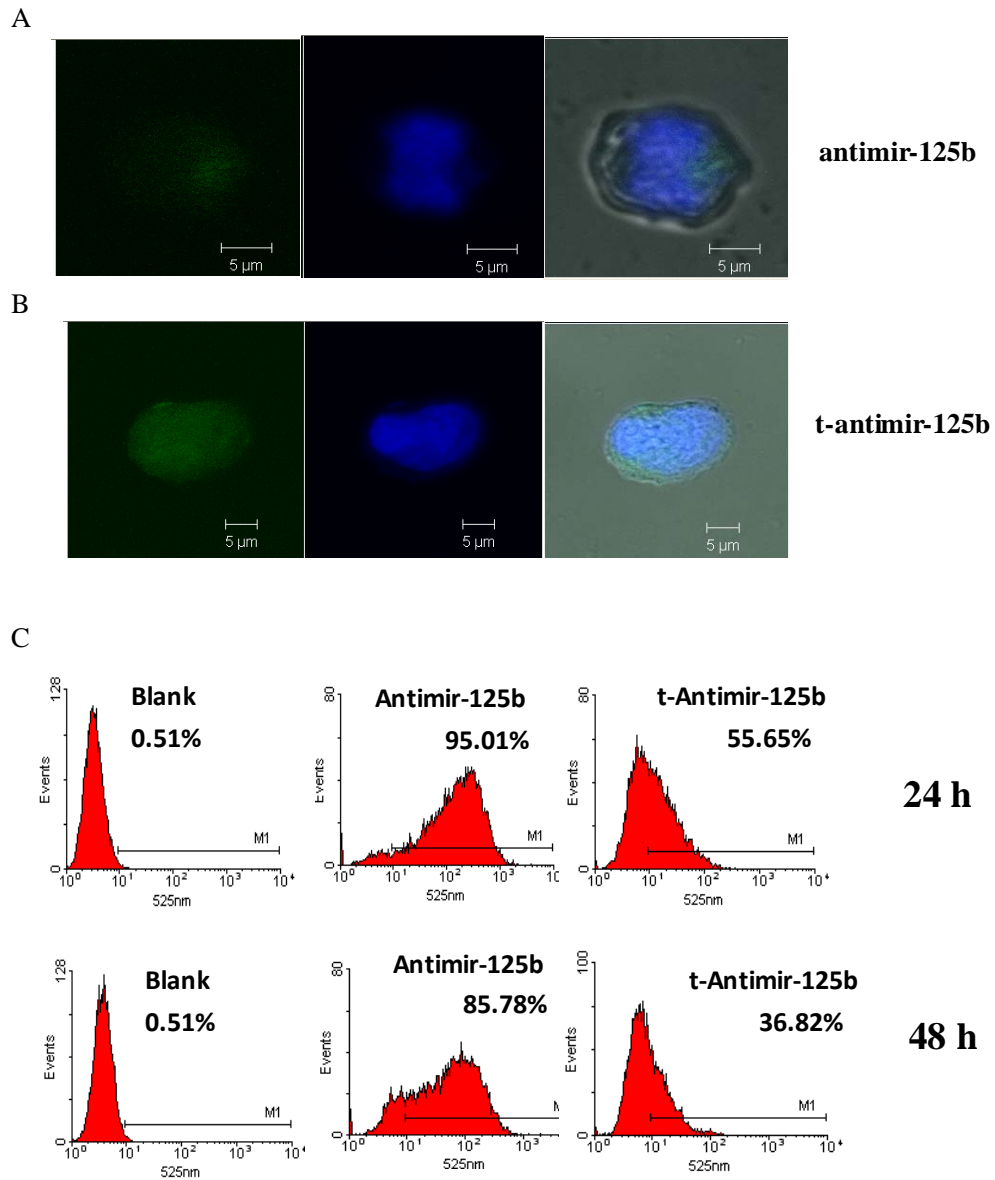

**Figure S3.**

## **Supplementary Legends**

**Figure S1. Sequences of anti-miR-125b, t-anti-miR-99a~125b cluster LNAs and seed sequences in the miR-99a~125b cluster.**

**Figure S2. Genes ranked by node numbers.**

The mRNAs differentially regulated by BBR were integrated by R software with gplots package and the top 30 genes were ranked by node numbers.

**Figure S3. Confocal localization and delivery of t-anti-mir-125b in comparison with anti-mir-125b.**

Anti-mir-125b and t-anti-mir-125b were modified with FITC, and transfected into RPMI-8266 cells. (A) Representative optical sections of FAM-labeled anti-mir-125b immediately post-transfection. (B) Representative optical sections of FAM-labeled t-anti-mir-125b immediately post-transfection. (C) Flow cytometry showed that anti-mir-125b and t-anti-mir-125b-FITC-positive cells were 95.01% and 55.65% of the total, respectively, 24 h post-transfection. These results indicated that t-anti-mir-125b-FITC was detected at high levels and was located mainly in the cytoplasm, but rapidly degraded in comparison with anti-mir-125b-FITC.
